# Supplementary material for: An Alternative STAT Signaling Pathway Acts in Viral Immunity in Caenorhabditis elegans
Source: PubMed Central journal article supplement (PMC5587905; doi:10.1128/mbio.00924-17), 2017-09-05
Supplement: mbo004173465st1.pdf [file mbo004173465st1.pdf]

| strain | genotype                                                                             |
|--------|--------------------------------------------------------------------------------------|
| EG6699 | ttTi5605 II; <i>unc-119(ed3)</i> III, oxEx1578                                       |
| IG1241 | <i>sta-2(ok1860)</i> V                                                               |
| RB2519 | <i>drh-1(ok3495)</i> IV                                                              |
| SX2375 | <i>drh-1(WT)(mjls225)</i> in JU1580                                                  |
| SX2862 | <i>sta-1(ok587)</i> IV ; <i>rde-1(ne219)</i> V                                       |
| SX2914 | <i>sta-1(ok587)</i> IV                                                               |
| SX2917 | <i>sta-1(ok587)</i> IV ; <i>sta-2(ok1860)</i> V                                      |
| SX2966 | mjSi88 II ; <i>unc-119(ed3)</i> III ; <i>sta-1(ok587)</i> IV                         |
| SX3020 | <i>rde-1(ne219)</i> V ; <i>sid-3(ok973)</i> X                                        |
| SX3024 | <i>sid-3(ok973)</i> X                                                                |
| SX3034 | <i>sid-3(tm342)</i> X                                                                |
| SX3035 | <i>sid-5(tm4328)</i> X                                                               |
| SX3037 | mjSi88 II ; <i>unc-119(ed3)</i> III ; <i>sta-1(ok587)</i> IV ; <i>sid-3(ok973)</i> X |
| SX3046 | <i>sid-1(qt129)</i> V                                                                |
| SX3072 | <i>sid-2(qt142)</i> III                                                              |
| SX3112 | <i>sid-2(qt42)</i> III                                                               |
| WM27   | <i>rde-1(ne219)</i> V                                                                |
